# Supplementary material for: Evaluation of Amine Functionalized Thermal Power Plant Solid Waste for Industrial Wastewater Remediation
Source: Hindawi journal article supplement (doi:10.1155/2022/8335566), 2022-01-01
Supplement: f1 [file 8335566.f1.docx]

**Supporting Information**

**Evaluation of Amine Functionalized Thermal Power Plant Solid Waste for Industrial Wastewater Remediation**

Ali Y. Kozbek,1 Kubilay Şahin,1 Ertuğrul Sarı,1 Esra Bedir,1 Fatma G. Yüce,1 Senem Çitoğlu,1,2 and Hatice Duran1,3*

1 Department of Materials Science and Nanotechnology Engineering, TOBB University of Economics and Technology, Ankara, 06510, Turkey.

2 Current address: Acıbadem Mehmet Ali Aydınlar University, Biomaterials Center, Ataşehir, İstanbul, 34684, Turkey.

3 Life Support Center, Hacettepe University Faculty of Medicine, 06230 Ankara, Turkey

**Figure S1**. N2 adsorption-desorption isotherms of fly ash samples at 77 K; (a) pristine LCFA, (b) activated-LCFA, (c) LCFA-APTES.

(c)

(a)

(b)


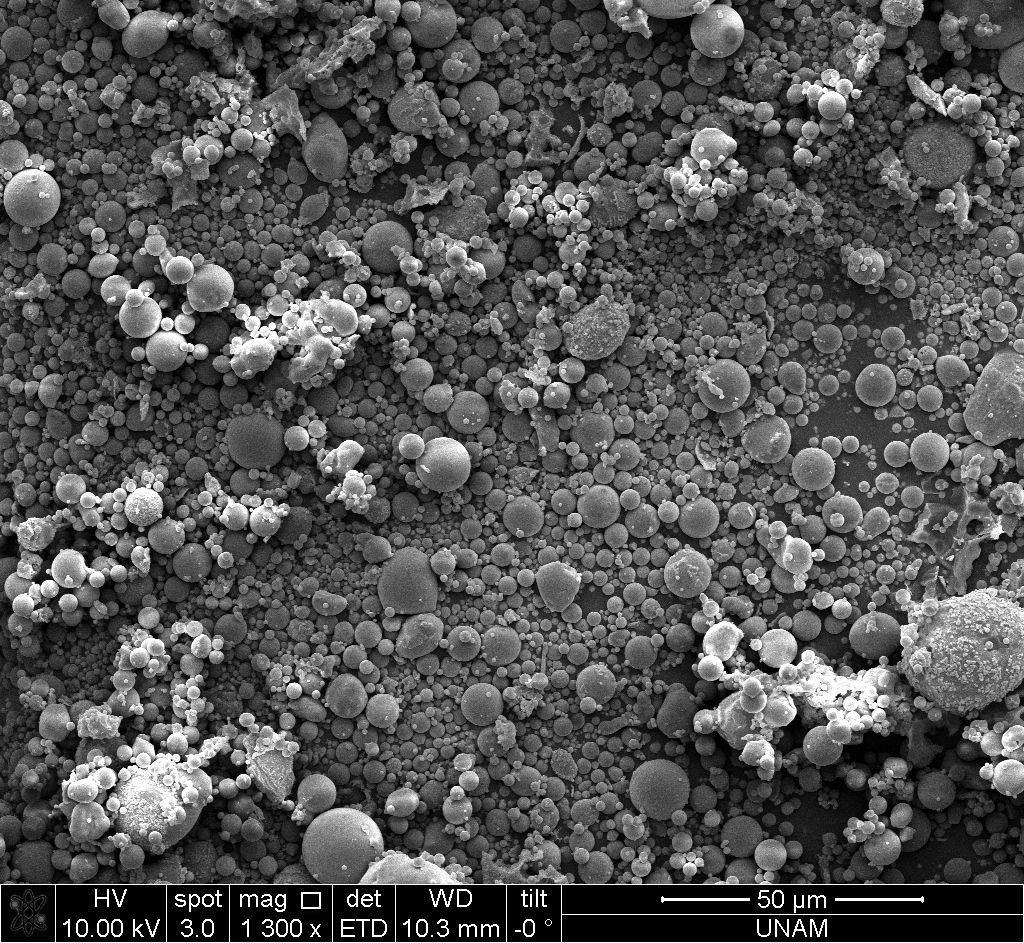

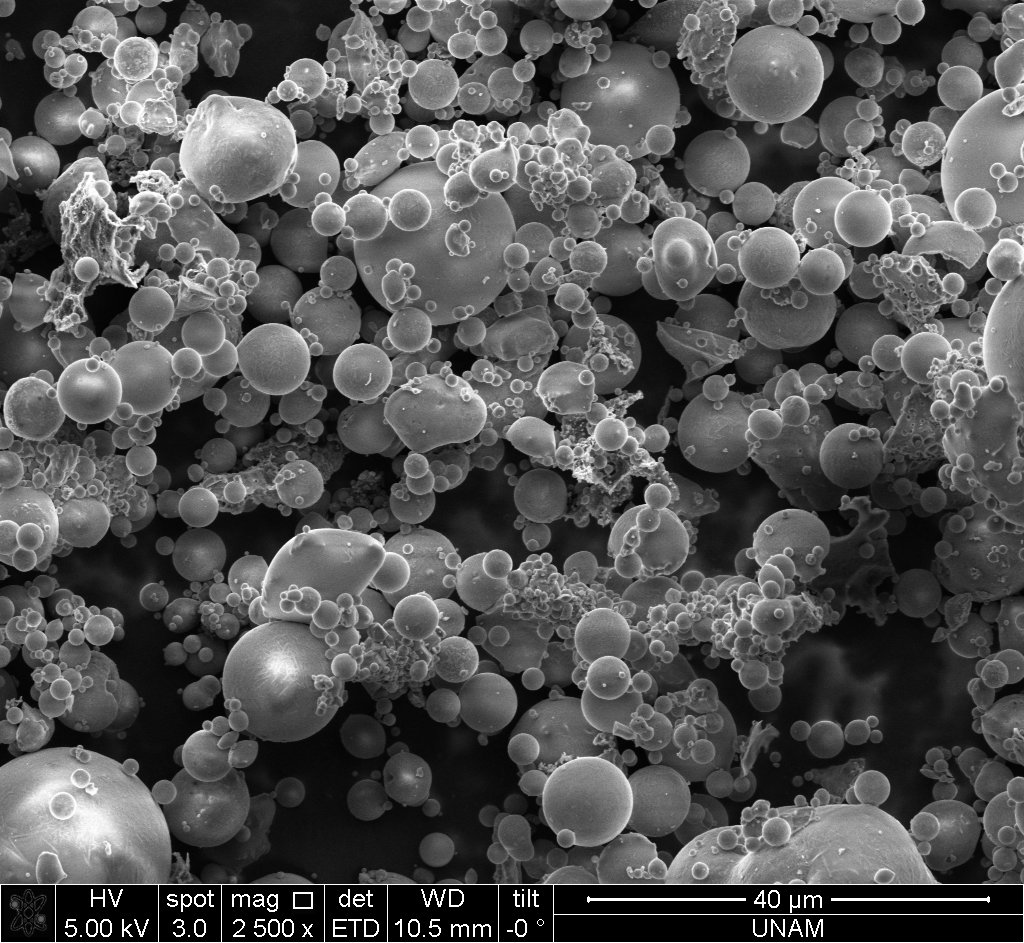

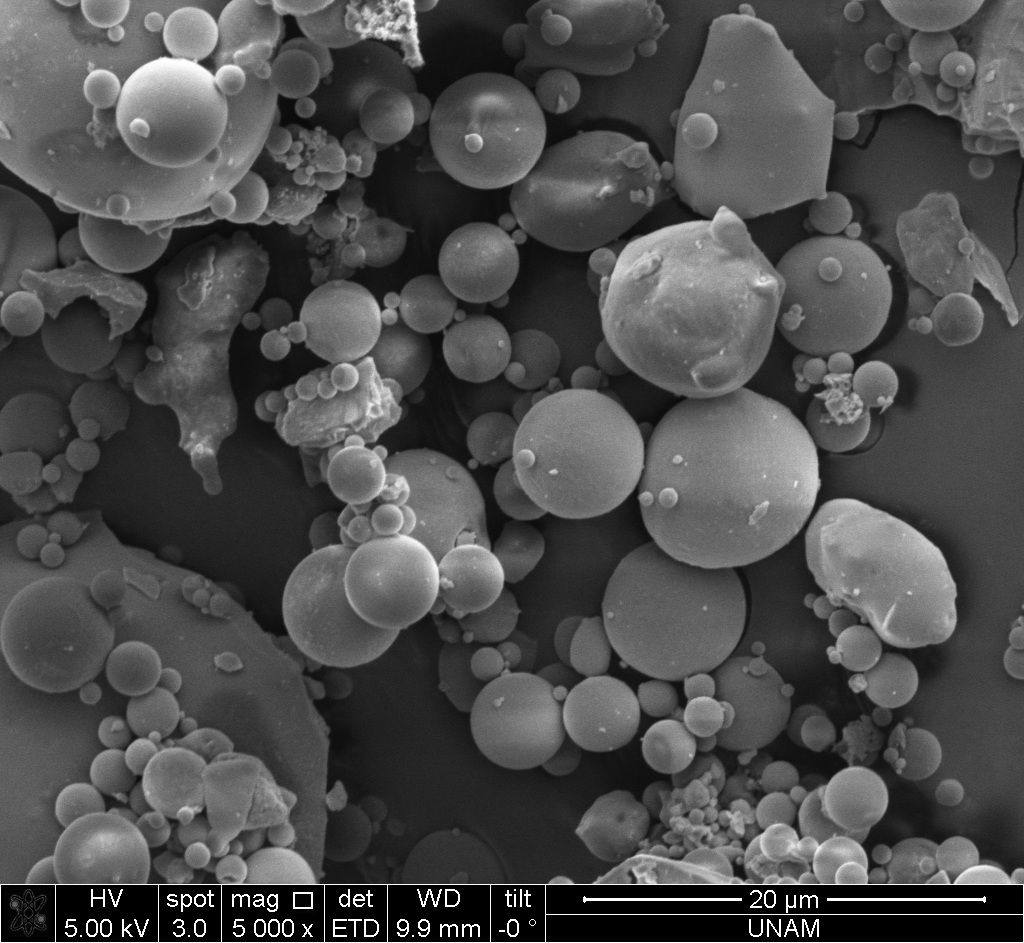


**Figure S2.** SEM images of **a)** Pristine LCFA, **b)** after washing with distilled water at 50°C and **c)** after acid (H3PO4) treatment.

**Table S1.** EDX elemental analysis of the pristine and surface functionalized LCFA

| Sample | Atomic % | | | | | | | |
| --- | --- | --- | --- | --- | --- | --- | --- | --- |
| Si | O | Al | K | Ca | N | C | Fe |
| Pristine LCFA | 18.78 | 44.12 | 18.88 | 6.52 | 10.97 | - | - | 0.73 |
| Activated LCFA | 14.60 | 60.22 | 15.28 | 3.64 | 5.98 | - | - | 0.29 |
| LCFA-APTES | 25.14 | 28.99 | 10.86 | 6.08 | 4.45 | 3.96 | 12.34 | 8.17 |

**Table S2.** Zeta potential measurement results of the pristine and surface functionalized LCFA**.**

|  | ZETA Potential (mV) | DLS Z-average diameter (nm) |
| --- | --- | --- |
| Pristine LCFA | -15.15 | 1390 (100%) |
| Activated LCFA | -21.85 | 183.9 (67.5%) / 2133 (32.5%) |
| LCFA-APTES | +20.25 | 154.1(64.7%) / 2523 (35.3%) |

**Figure S3.** TGA curves of the LCFAs.
